# Supplementary material for: Barriers and enablers to diabetic retinopathy screening attendance: Protocol for a systematic review
Source: Springer Nature journal article supplement (doi:10.1186/s13643-016-0309-2), 2016-08-11
Supplement: MOESM1 [file 10579456]

Additional file 1: Prisma-P Checklist

| Section/Topic                     | Item | Checklist Item                                                                                                                                                                                                           | Page   |
|-----------------------------------|------|--------------------------------------------------------------------------------------------------------------------------------------------------------------------------------------------------------------------------|--------|
| <b>Administrative Information</b> |      |                                                                                                                                                                                                                          |        |
| Title                             |      |                                                                                                                                                                                                                          |        |
| Identification                    | 1a   | Identify the report as a protocol of a systematic review                                                                                                                                                                 | P.1    |
| Update                            | 1b   | If the protocol is for an update of a previous systematic review, identify as such                                                                                                                                       | N/A    |
| Registration                      | 2    | If registered, provide the name of the registry (e.g. PROSPERO) and registration number                                                                                                                                  | P.3/8  |
| <b>Authors</b>                    |      |                                                                                                                                                                                                                          |        |
| Contact                           | 3a   | Provide name, institutional affiliation, and e-mail address of all protocol authors; provide physical mailing address of corresponding author                                                                            | P.1    |
| Contributions                     | 3b   | Describe contributions of protocol authors and identify the guarantor of the review                                                                                                                                      | 25     |
| Amendments                        | 4    | If the protocol represents an amendment of a previously completed or published protocol, identify as such and list changes; otherwise, state plan for documenting important protocol amendments                          | N//A   |
| <b>Support</b>                    |      |                                                                                                                                                                                                                          |        |
| Sources                           | 5a   | Indicate sources of financial or other support for review                                                                                                                                                                | P24    |
| Sponsor                           | 5b   | Provide name for the review funder and/or sponsor                                                                                                                                                                        | P24    |
| Role of sponsor/funder            | 5c   | Describe role of funder(s), sponsor(s), and/or institution(s), if any, in developing the protocol                                                                                                                        | P24    |
| <b>INTRODUCTION</b>               |      |                                                                                                                                                                                                                          |        |
| Rationale                         | 6    | Describe the rationale for the review in the context of what is already known                                                                                                                                            | P7/8   |
| Objectives                        | 7    | Provide an explicate statement of the question(s) the review will address with reference to participants, interventions, comparators and outcomes (PICO)                                                                 | P8     |
| <b>METHODS</b>                    |      |                                                                                                                                                                                                                          |        |
| Eligibility criteria              | 8    | Specify the study characteristics (e.g. PICO, study design, setting, time frame) and report characteristics (e.g., years considered, language, publication status) to be used as criteria for eligibility for the review | P8-9   |
| Information sources               | 9    | Describe all intended information source (e.g., electronic databases, contact with study authors, trial registers, or other grey literature sources) with planned dates of coverage                                      | P10-11 |

|                                    |     |                                                                                                                                                                                                                      |         |
|------------------------------------|-----|----------------------------------------------------------------------------------------------------------------------------------------------------------------------------------------------------------------------|---------|
| Search strategy                    | 10  | Present draft of search strategy to be used for at least one electronic database, including planned limits, such that it could be repeated                                                                           | P30-33  |
| Study records                      |     |                                                                                                                                                                                                                      |         |
| Data management                    | 11a | Describe the mechanism(s) that will be used to manage records and data throughout the review                                                                                                                         | P.12    |
| Selection process                  | 11b | State the process that will be used for selecting studies (e.g., two independent reviewers) through each phase of the review (i.e., screening, eligibility, and inclusion in meta-analysis)                          | P.11/12 |
| Data collection process            | 11c | Describe planned methods of extracting data from reports (e.g., piloting forms, done independently, in duplicate), any processes of obtaining and confirming data from investigators                                 | P 12    |
| Data items                         | 12  | List and define all variables for which data will be sort (e.g., PICO items, funding sources), any pre-planned data assumptions and simplifications                                                                  | NA      |
| Outcomes and prioritisation        | 13  | List and define all outcomes for which data will be sort, including prioritisation or main and additional outcomes, and rationale                                                                                    | NA      |
| Risk of bias in individual studies | 14  | Describe anticipated methods for assessing risk of bias of individual studies, including whether this will be done at the outcome or study level, or both; state how this information will be used in data synthesis | P.12    |
| DATA                               |     |                                                                                                                                                                                                                      |         |
| Synthesis                          | 15a | Describe criteria under which data will be quantitatively synthesised                                                                                                                                                | N/A     |
|                                    | 15b | If data are appropriate for quantitative synthesis, describe planned summary measures, methods of handling data, and methods of combining data from studies, including any planned exploration of consistency        | N/A     |
|                                    | 15c | Describe any proposed additional analyses (e.g., sensitivity, or subgroup analysis, meta-regression.                                                                                                                 | P16     |
|                                    | 15d | If quantitative synthesis is not appropriate, describe the type of summary planned                                                                                                                                   | P14-16  |
| Meta-bias(es)                      | 16  | Specify any planned assessment of meta-bias(es) (e.g., publication bias across studies, selective reporting within studies)                                                                                          | N/A     |
| Confidence in cumulative evidence  | 17  | Describe how the strength of the body of evidence will be assessed (e.g. GRADE)                                                                                                                                      | N/A     |
