# Supplementary material for: Barriers and enablers to diabetic retinopathy screening attendance: Protocol for a systematic review
Source: Springer Nature journal article supplement (doi:10.1186/s13643-016-0309-2), 2016-08-11
Supplement: MOESM2 [file 10579456]

## Additional file 2: Search strategy for MEDLINE

- 1 exp Diabetic Retinopathy/
- 2 ((diabet\$ or proliferative or non-proliferative) adj4 retinopath\$).tw.
- 3 diabetic retinopathy.kw.
- 4 (diabet\$ adj3 (eye\$ or vision or visual\$ or sight\$)).tw.
- 5 (retinopath\$ adj3 (eye\$ or vision or visual\$ or sight\$)).tw.
- 6 (DR adj3 (eye\$ or vision or visual\$ or sight\$)).tw.
- 7 or/1-6)
- 8 exp Mass Screening/
- 9 exp Vision Tests/
- 10 exp Telemedicine/
- 11 exp Photography/
- 12 exp Ophthalmoscopes/
- 13 exp Ophthalmoscopy/
- 14 (ophthalmoscop\$ or fundoscop\$ or funduscop\$).ti.
- 15 ((exam\$ or photo\$ or imag\$) adj3 fundus).tw.
- 16 (photography or retinography).tw.
- 17 ((mydriatic or digital or retina\$ or fundus or stereoscopic) adj3 camera).tw.
- 18 ((mydriatic or digital or retina\$ or fundus or stereoscopic) adj3 imag\$).tw.
- 19 screen\$.tw.
- 20 ((eye\$ or retina\$ or ophthalm\$) adj4 exam\$).tw.
- 21 ((eye or vision or retinopathy or ophthalmic) adj4 test\$).tw.
- 22 ((eye\$ or retina\$ or ophthalm\$) adj4 visit\$).tw.
- 23 Office Visits/
- 24 (telemedicine\$ or telemonitor\$ or telescreen\$ or telehealth or teleophthalmology).tw.
- 25 or/8-24
- 26 exp Patient Acceptance of health Care/
- 27 exp Attitude to Health/
- 28 exp Health Behavior/
- 29 Motivation/

- 30 Fear/
- 31 exp Self Concept/
- 32 Personal Autonomy/
- 33 Self Care/
- 34 Behavior Therapy/
- 35 (barrier\$ or obstacle\$ or facilitat\$ or enable\$).tw.
- 36 (knowledge or skill\$ or role\$ or identity or capabilit\$ or optimis\$ or consequence\$ or reinforcement or intention\$ or goal\$ or memory or attention or context\$ or resources or emotion\$).tw.
- 37 (decision adj2 process\$).tw.
- 38 (social adj2 influence\$).tw.
- 39 (behavioural adj2 regulation).tw.
- 40 (competence or self-efficac\$ or self-confidence or incentiv\$ or reward\$ or anxiety fear\$ or self-monitor\$ or habits).tw.
- 41 (outcome adj2 expectanc\$).tw.
- 42 (action adj2 plan\$).tw.
- 43 (decision adj2 mak\$).tw.
- 44 (social adj2 (support\$ or norm)).tw.
- 45 ((behaviour\$ or behavior\$) adj3 (change\$ or modif\$ or activat\$ or control\$ or amend\$)).tw.
- 46 (uptake or takeup or attend\$ or accept\$ or adhere\$ or attitude\$ or participat\$ or facilitat\$ or utilisat\$ or utilizat\$).tw.
- 47 (motivat\$ or satisf\$ or promot\$ or consent\$ or self select\$ or self referr\$).tw.
- 48 (complie\$ or comply or compliance\$ or noncompliance\$ or non compliance\$).tw.
- 49 (encourag\$ or discourage\$ or reluctan\$ or nonrespon\$ or non respon\$ or refuse\$).tw.
- 50 (non-attend\$ or non attend\$ or dropout or drop out or apath\$).tw.
- 51 Health Education/
- 52 exp Patient Education as Topic/
- 53 exp Health Promotion/
- 54 exp Counseling/
- 55 "Attitude of Health Personnel"/
- 56 (health adj2 (promotion\$ or knowledge or belief\$)).tw.
- 57 (educat\$ adj2 (intervention\$ or information or material or leaflet)).tw.
- 58 Focus groups/

59 Interviews as Topic/  
60 (focus adj3 group\$).tw.  
61 Socioeconomic Factors/  
62 exp Poverty/  
63 Social Class/  
64 Educational Status/  
65 ((school or education\$) adj3 (status or level\$ or attain\$ or achieve\$)).tw.  
66 Employment/  
67 Uncompensated Care/  
68 Reimbursement Mechanisms/  
69 Reimbursement, Incentive/  
70 (insurance adj3 (health\$ or scheme\$)).tw.  
71 (financial or pay or payment or copayment or paid or fee or fees or monetary or incentiv\$ or disincentiv\$).tw.  
72 Healthcare Disparities/  
73 Health Status Disparities/  
74 exp Medically Underserved Area/  
75 Rural Population/  
76 Urban Population/  
77 exp Ethnic Groups/  
78 Minority Groups/  
79 Vulnerable Populations/  
80 ((health\$ or social\$ or racial\$ or ethnic\$) adj5 (inequalit\$ or inequit\$ or disparit\$ or equit\$ or disadvantage\$ or depriv\$)).tw.  
81 (disadvant\$ or marginali\$ or underserved or under served or impoverish\$ or minorit\$ or racial\$ or ethnic\$).tw.  
82 or/26-80  
83 7 and 25 and 82)  
84 limit 83 to yr="1990 -Current"  
85 (ranibizumab or bevacizumab or avastin or aflibercept).ti.  
86 (cataract\$ or intraocular or glaucoma\$ or phaco\$ or photocoagulat\$ or photodynamic or laser\$ or vitrectom\$).ti.  
87 (macula\$ adj2 (degener\$ or oedema or edema)).ti.

- 88 nerve fiber layer.ti.
- 89 (coronary or cardiac or cardio\$ or heart or myocardia\$ or artery or aneurysm or atrial or echocardiography or hypertension or hypotension or stroke or pulmonary or COPD or lung\$ or organ\$ or smoking).ti.
- 90 (pregnan\$ or gestational or neonat\$ or perinatal or maternal or trimester or congenital or ovary or breast\$).ti.
- 91 (kidney or liver or cirrhosis or renal or hepatitis or dialysis or pancrea\$ or gastric or gastrectom\$ or surg\$ or duoden\$).ti.
- 92 (blood glucose or blood pressure or ketoacidosis or hypoglycemi\$ or rosiglitazone).ti.
- 93 (lipid\$ or lipase\$ or statin\$ or hypercholesterolemia or microalbumin\$ or albumin\$ or platlet\$ or plasma\$ or hemoglobin\$ or haemochromat\$ or arterial).ti.
- 94 (cancer\$ or carcinoma\$ or neoplas\$ or adenoma\$ or metformin\$).ti.
- 95 (urin\$ or incontinence or bladder or constipat\$ or bowel\$ or faecal or colorectal or colon\$).ti.
- 96 (gene\$ or genotype\$ or genome\$ or genomic or phenotyp\$ or biomarker\$ or polymorphism\$ or interleukin\$).ti.
- 97 (cell\$ or molecular or assay).ti.
- 98 (cystic or fibrosis or CF or tuberculosis or TB or lupus).ti.
- 99 (neuropath\$ or nephropath\$ or prematurity).ti.
- 100 (\$arthritis or steroid\$ or osteoporosis or atherosclerosis or sclerosis).ti.
- 101 (apnea or sleep or limb or oral\$ or celiac or coeliac or skin or MRSA or anesthesia or vitamin or HIV or testosterone or erectile or schizophren\$ or bipolar or antipsychotic\$ or psychotic\$).ti.
- 102 prevalence.ti.
- 103 or/85-102
- 104 84 not 103

\*\*\*\*\*
